# Supplementary material for: A treasure map for nonmetallic catalysts: optimal nitrogen and fluorine distribution of biomass-derived carbon materials for high-performance oxygen reduction catalysts
Source: Royal Society of Chemistry journal article supplement (doi:10.1039/d1ta05485f), 2021-01-01
Supplement: d1ta05485f1.pdf [file d1ta05485f1.pdf]

## Supplementary Information

### Treasure Map for Nonmetallic Catalyst: Optimal Nitrogen and Fluorine Distribution of Biomass-Derived Carbon Materials for High-Performance Oxygen Reduction Catalysts

Yaling Zhao,<sup>‡a</sup> Yang Liu,<sup>‡b</sup> Ye Chen,<sup>b</sup> Xupo Liu,<sup>b</sup> Xiaoge Li,<sup>c</sup> Shuyan Gao<sup>\*ab</sup>

<sup>a</sup>School of Chemistry and Chemical Engineering, Henan Normal University, Xinxiang, Henan 453007, P. R. China

<sup>b</sup>School of Materials Science and Engineering, Henan Normal University, Xinxiang, Henan 453007, P. R. China

<sup>c</sup>Key Laboratory of Mesoscopic Chemistry of MOE, School of Chemistry and Chemical Engineering, Nanjing University, Nanjing, Jiangsu 210023, P. R. China.

\*Corresponding authors: shuyangao@htu.cn

<sup>‡</sup>Y. Zhao and Y. Liu contribute equally to this work.

## EXPERIMENTAL SECTION

### Materials:

All chemicals were of analytical grade and used directly as received. Zinc chloride ( $\text{ZnCl}_2$ ), ammonium hydroxide ( $\text{NH}_3 \cdot \text{H}_2\text{O}$ ), ammonium fluoride ( $\text{NH}_4\text{F}$ ), and hydrochloric acid ( $\text{HCl}$ ) were obtained from Alfa Aesar. Nearly 30 kinds of natural biomass were purchased from a vegetable market in Xinxiang and washed for further use.

### Preparation of N, F dual-doped porous carbon materials:

The washed alfalfa was dried and smashed by a pulverizer. 1 g of alfalfa powder and 0.37 g of  $\text{NH}_4\text{F}$  (0.01 mol) were mixed well in a mortar, then carbonized in  $\text{N}_2$  atmosphere at  $500\text{ }^\circ\text{C}$  for 2 h, later naturally cooled to room temperature. 0.022 mol of  $\text{NH}_3 \cdot \text{H}_2\text{O}$  was rapidly dropped into a  $\text{ZnCl}_2$  aqueous solution (containing 0.022 mol of  $\text{ZnCl}_2$ ) to obtain a mixed activator suspension liquid consisting of  $\text{ZnCl}_2$  and  $\text{Zn}(\text{OH})_2$ . The beforehand carbonized product was mixed with above suspension liquid uniformly and dried, carbonized for 2 h in  $\text{N}_2$  flow at  $900\text{ }^\circ\text{C}$ , subsequently immersing in  $2\text{ mol L}^{-1}$   $\text{HCl}$  overnight, and then washed with water to neutral to obtain the N, F co-doped porous carbon material (NF-PC). The NF-PCs obtained with alfalfa as precursor are denoted as NF-x. For comparison, the control samples of NF-3.31, NF-4.27, NF-4.84, NF-5.58, NF-6.44 and NF-7.19 were prepared using the same synthesis method except for different molar dosages of  $\text{NH}_4\text{F}$ , which were 0.001, 0.005, 0.01, 0.02, 0.03 and 0.04 mol, respectively. The others NF-PCs obtained from the additional 26 biomass species are denoted as NF-y. Both x and y represent the total N, F contents incorporated in in site NF-PCs.

### Preparation of working electrode:

The glassy carbon electrode (GC, diameter = 3/5 mm) was polished with an alumina (0.05  $\mu\text{m}$ ) polishing solution. 1 mg of sample, 20  $\mu\text{L}$  of Nafion ethanol solution and 100  $\mu\text{L}$  of ultrapure water, were mixed well through a ultrasonic treatment for 30 minutes to obtain the uniform ink-like liquid. 5/12  $\mu\text{L}$  of above ink-like liquid was dropped on the GC (diameter = 3/5 mm), then dried naturally for further use. The final loading mass were 0.59 and 0.51 mg  $\text{cm}^{-2}$  for 3 and 5 mm GC, respectively.

### **Electrochemical measurements:**

The rotating ring-disk/disk electrode test (RRDE, 5 mm in diameter ) and cyclic voltammetry (CV, 3 mm) were performed in 0.1/1 mol  $\text{L}^{-1}$  KOH solution saturated with  $\text{N}_2$  or  $\text{O}_2$  through a CHI 660E/760E electrochemical workstation at room temperature. A platinum sheet (1  $\text{cm}^2$ ), a glassy carbon electrode coated with the catalyst, and a reversible hydrogen electrode (RHE) were used as the counter, working and reference electrode, respectively. Except for the 50  $\text{mV s}^{-1}$  of scan rates for methanol resistance tests, the scan rates were 10  $\text{mV s}^{-1}$  for the other CV tests. The scan potential ranges were 0.07 ~ 1.06 V and 0.8 ~ 1.8 V for ORR and OER measurements by using RRDE/RDE system. The scan rates were 10  $\text{mV s}^{-1}$  and electrode rotation speeds were 1600 rpm for both RRDE and RDE measurements. The  $\text{H}_2\text{O}_2$  yield and electron transfer number during ORR were acquired by the following formulas (Equation 1 & 2):

$$n = 4I_d / (I_d + I_r / N) \quad (1)$$

$$\text{H}_2\text{O}_2\% = 200I_r / (NI_d + I_r) \quad (2)$$

where  $n$  is the electron transfer number and  $H_2O_2\%$  is the hydrogen peroxide yield during ORR process,  $I_d$  is the disk current,  $I_r$  is the ring current,  $N$  represents the current collection efficiency of the platinum ring and  $N = 0.37$ .

### **Rechargeable Zn–Air Battery**

The as-prepared catalyst and Pt/C was treated to an ink status as described in above electrochemical measurements section. The catalyst ink was dropped on the carbon paper and dried to obtain an air–cathode diffusion layer. The loading mass was  $1.0 \text{ mg cm}^{-2}$  for metal-free porous carbon material and  $1.0 \text{ mg cm}^{-2}$  for Pt/C. As a comparison, the Pt/C and  $\text{IrO}_2$  ink with a loading mass of  $1.0$  and  $1.0 \text{ mg cm}^{-2}$  were employed as the air–cathode diffusion layer for another ZAB. A zinc plate was as the another anode and  $6 \text{ M KOH}$  solution containing  $0.2 \text{ M Zn}(\text{Ac})_2 \cdot 2\text{H}_2\text{O}$  was employed as the electrolyte. The charge-discharge curves were collected by CHI 760E electrochemical workstation. The galvanostatic charge–discharge measurements were carried out by chronopotentiometry test system.

### **Characterization:**

Microscopic morphologies of all the samples were investigated by the field emission scanning electron microscopy (FE-SEM, Zeiss Supra 40, Japan) and transmission electron microscopy (TEM, JEOL JEM-2100, Japan). The porous nature was determined via the density functional theory (DFT) method by analyzing the  $\text{N}_2$  adsorption-desorption isotherms, which were recorded at  $77 \text{ K}$  using a Micromeritics ASAP 2020 apparatus. The Raman and X-ray diffraction (XRD) patterns were collected using a Renishaw Spectroscopy with a  $514 \text{ nm}$  excitation laser and a Bruker-D8 instrument with Cu radiation, respectively. The elemental compositions were qualitatively and quantitatively analyzed by the X-ray

photoelectron spectroscopy (XPS, ESCALAB 250, America) measurement. The water contact angle (CA) test was performed using the contact angle meter (KRÜSS DSA25, Germany).

## Discussion

The influence of heteroatom source ( $\text{NH}_4\text{F}$ ) and porogen ( $\text{ZnCl}_2$  and  $\text{Zn}(\text{OH})_2$ ) on the composition and pore structure of carbon materials has been studied. Except for NF-4.84 (alfalfa mixed with both  $\text{NH}_4\text{F}$  and porogens were carbonized), the control samples of C (only alfalfa was carbonized), C-NF (alfalfa mixed with  $\text{NH}_4\text{F}$  were carbonized) and C-Zn (alfalfa mixed with porogens were carbonized) were prepared. The SEM images shown in **Fig. S17a-17d** indicate that the addition of both  $\text{NH}_4\text{F}$  and porogens is resulted in abundant nanoscale pores in carbon material. The XPS spectra (**Fig. S17e**, **Table S1**) of C-NF and NF-4.84 demonstrate the successful incorporation of N and F into carbon matrix when using  $\text{NH}_4\text{F}$  as heteroatom source. According to  $\text{N}_2$  adsorption/desorption isotherms (**Fig. S17f**) and pore size distributions (**Fig. S17g**), obviously, NF-4.84 possesses the largest specific surface area (**Table S1**) and most pore amount among C, C-NF, C-Zn and NF-4.84. XRD (**Fig. S17h**) and Raman (**Fig. S17i**) results present the coexistence of disorder nature and partial graphitization in these carbon materials. Moreover, the electrochemical measurement results including CV (**Fig. S17j**) and RRDE curves (**Fig. S17k**) manifest that NF-4.84 exhibits the most positive peak potential (**Table S1**) and half wave potential, as well as the largest peak current density and limiting current density. Briefly, the above information reveals that NF-4.84 sample with both N, F heteroatoms and large specific surface area exhibits the remarkable ORR performance (**Fig. S17j, k**).

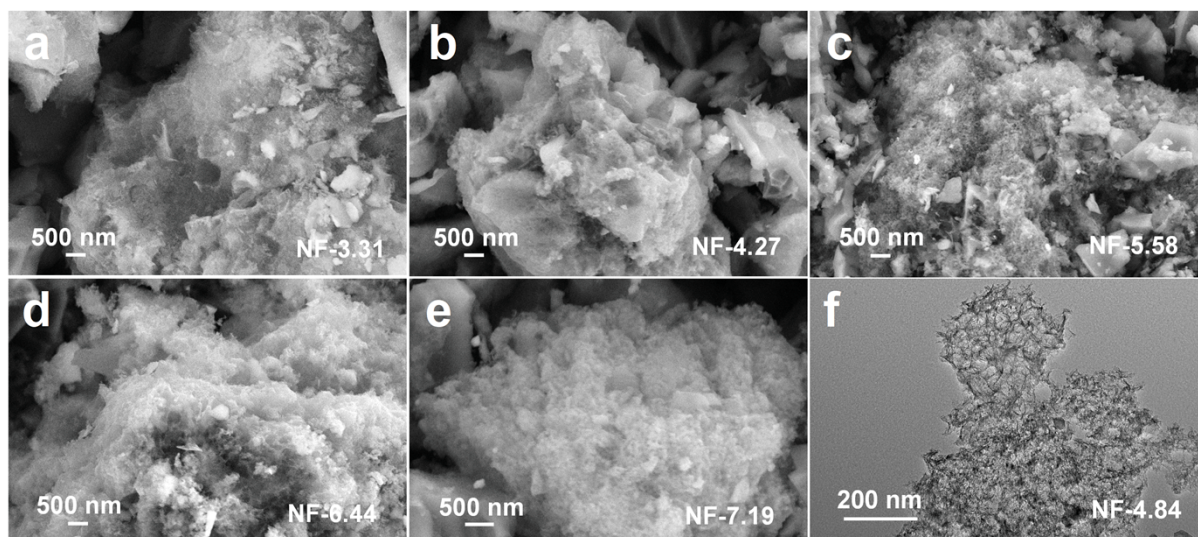

**Fig. S1** (a-e) FE-SEM images NF-x. (f) TEM image of NF-4.84.

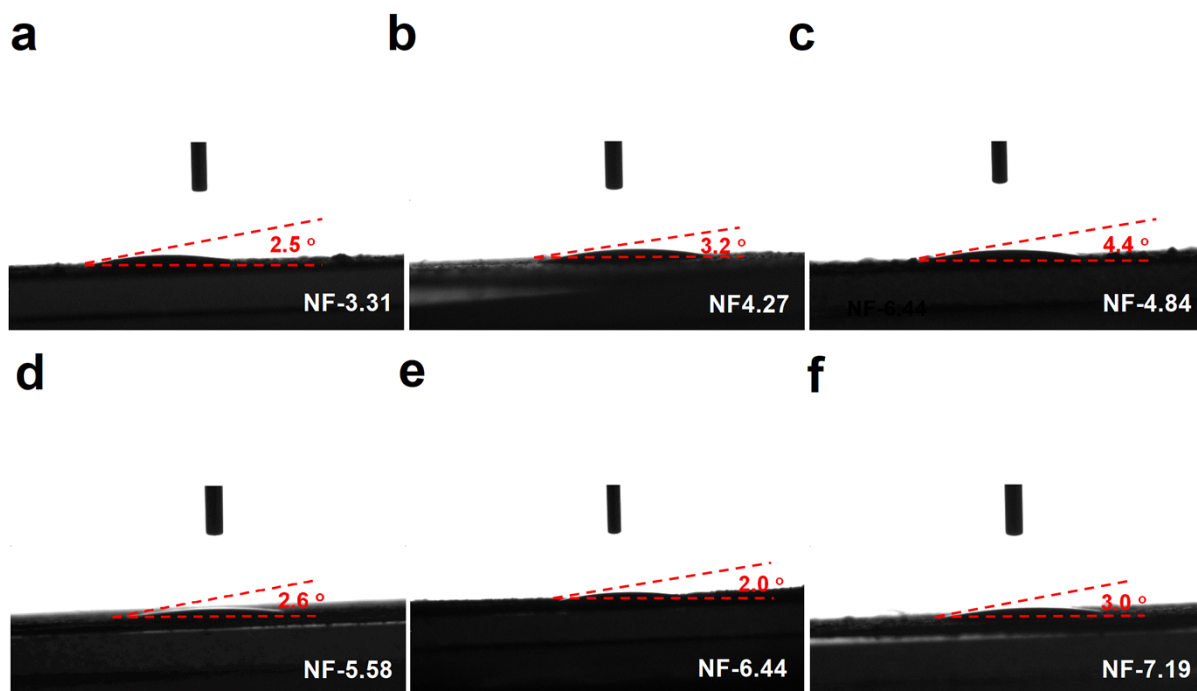

**Fig. S2** CA images for NF-x.

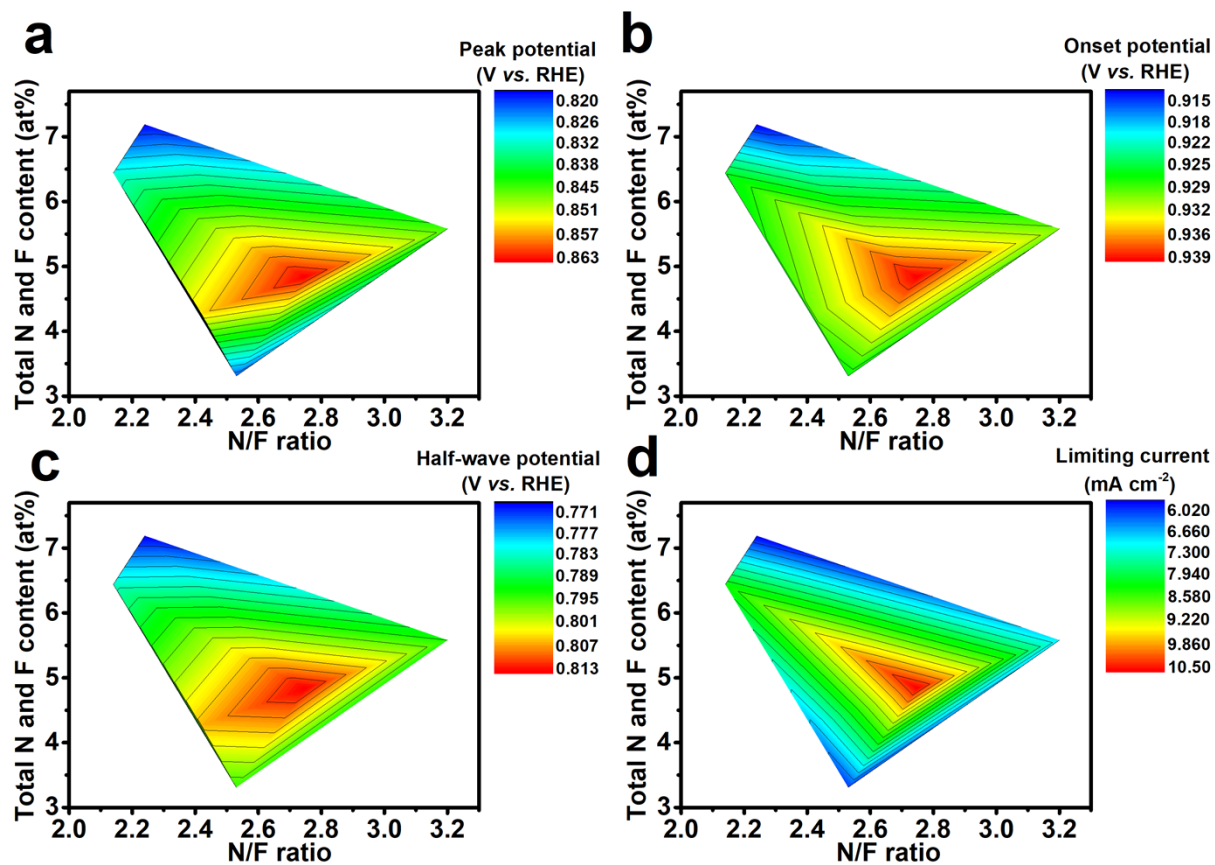

**Fig. S3** Linearized activity volcano for (a) peak potential, (b) onset potential, (c) half-wave potential and (d) limiting current density as the function of total N, F content and N/F ratio based on NS-x. Dark red indicates maximum ORR activity.



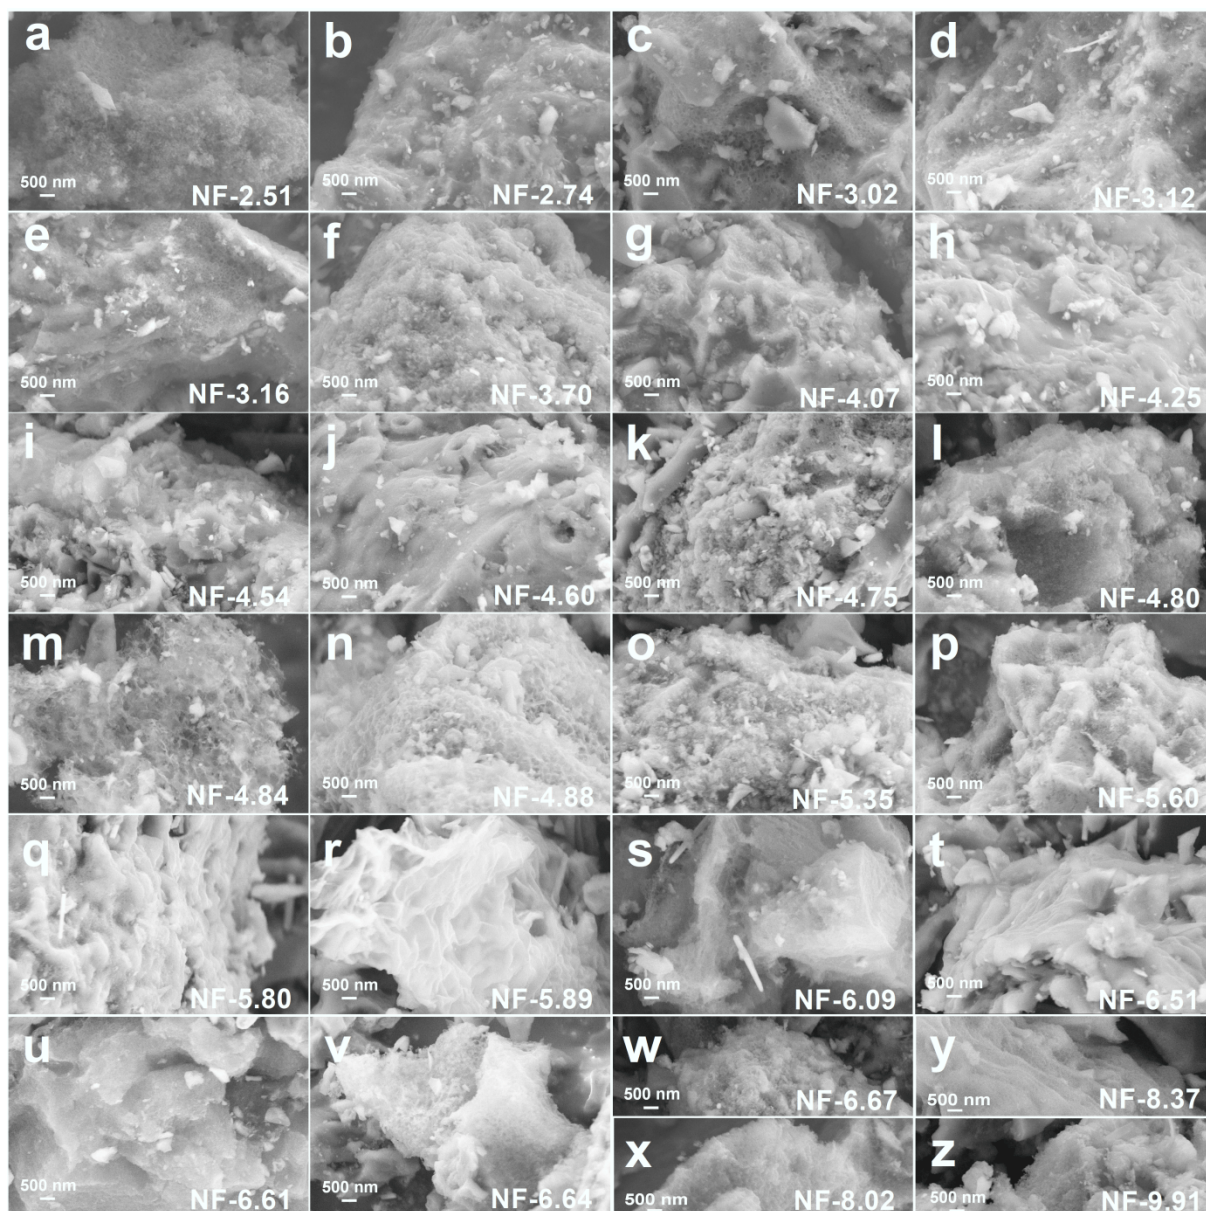

**Fig. S4** The SEM images for NF-y derived from (a) cantaloupe peel, (b) pomegranate peel, (c) bark, (d) longan shell, (e) white beech mushroom, (f) oil bran, (g) apricot flowers, (h) radish leaves, (i) corn stigmas, (j) winter melon peel, (k) durian peel, (l) willow leaves, (m) alfalfa, (n) banana peel, (o) radish peel, (p) leek moss, (q) dandelion leaves, (r) long bean, (s) sweet potato stems, (t) orange peel, (u) soybean curb residue, (v) firmiana simplex flowers, (w) sweet potato leaves, (x) wheat stalk, (y) solidago, (z) pepper leaves.

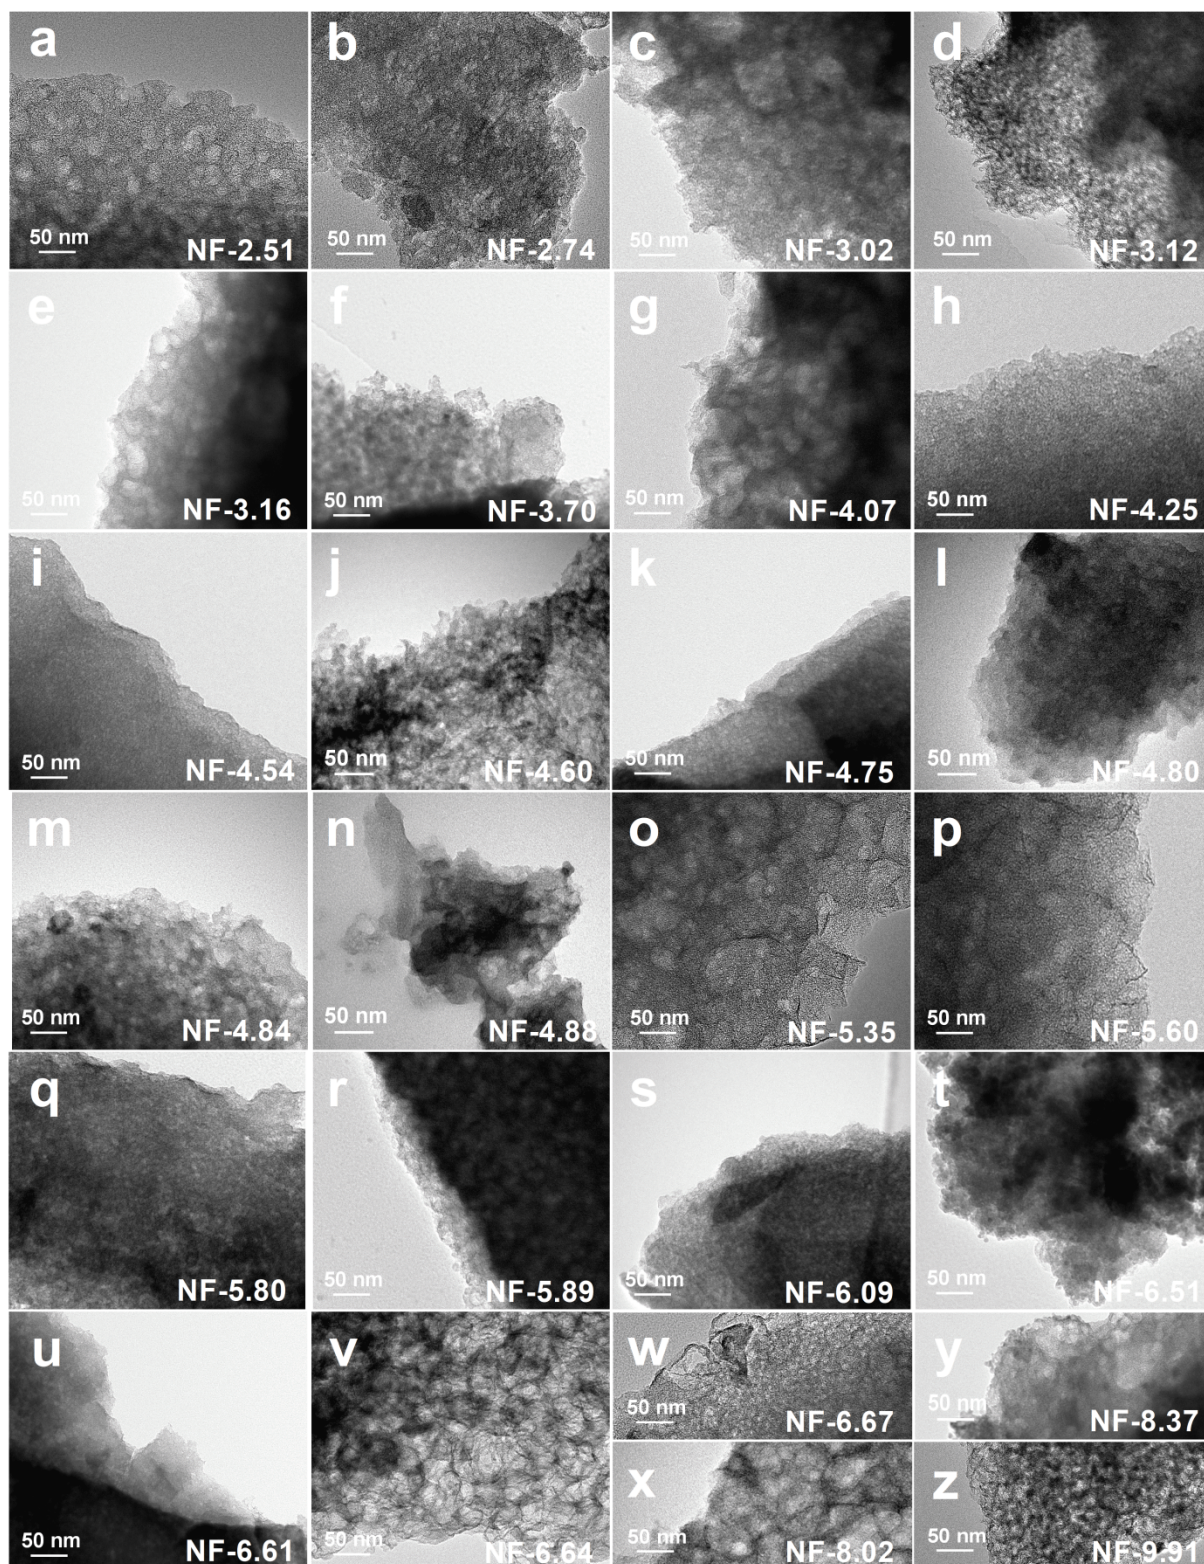

**Fig. S5** The TEM images for NF-y derived from (a) cantaloupe peel, (b) pomegranate peel, (c) bark, (d) longan shell, (e) white beech mushroom, (f) oil bran, (g) apricot flowers, (h) radish leaves, (i) corn stigmas, (j) winter melon peel, (k) durian peel, (l) willow leaves, (m) alfalfa, (n) banana peel, (o) radish peel, (p) leek moss, (q) dandelion leaves, (r) long bean, (s) sweet potato stems, (t) orange peel, (u) soybean curb residue, (v) firmiana simplex flowers, (w) sweet potato leaves, (x) wheat stalk, (y) solidago, (z) pepper leaves.

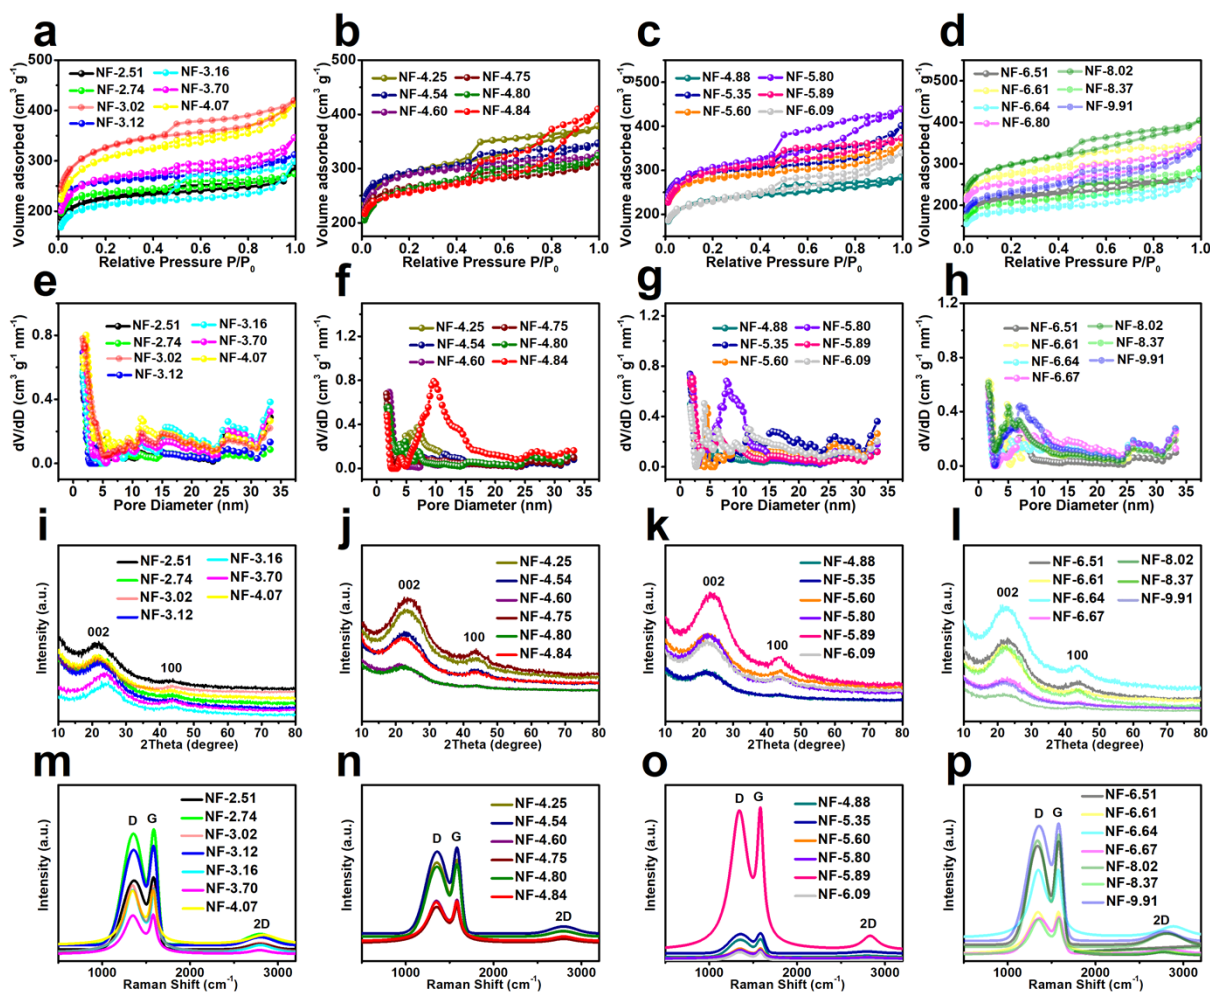

**Fig. S6** (a-d)  $N_2$  adsorption/desorption isotherms, (e-h) pore size distributions, (i-l) XRD and (m-p) Raman patterns for NF-y derived from cantaloupe peel, pomegranate peel, bark, longan shell, white beech mushroom, oil bran, apricot flowers, radish leaves, corn stigmas, winter melon peel, durian peel, willow leaves, alfalfa, banana peel, radish peel, leek moss, dandelion leaves, long bean, sweet potato stems, orange peel, soybean curd residue, firmiana simplex flowers, sweet potato leaves, wheat stalk, solidago, pepper leaves.

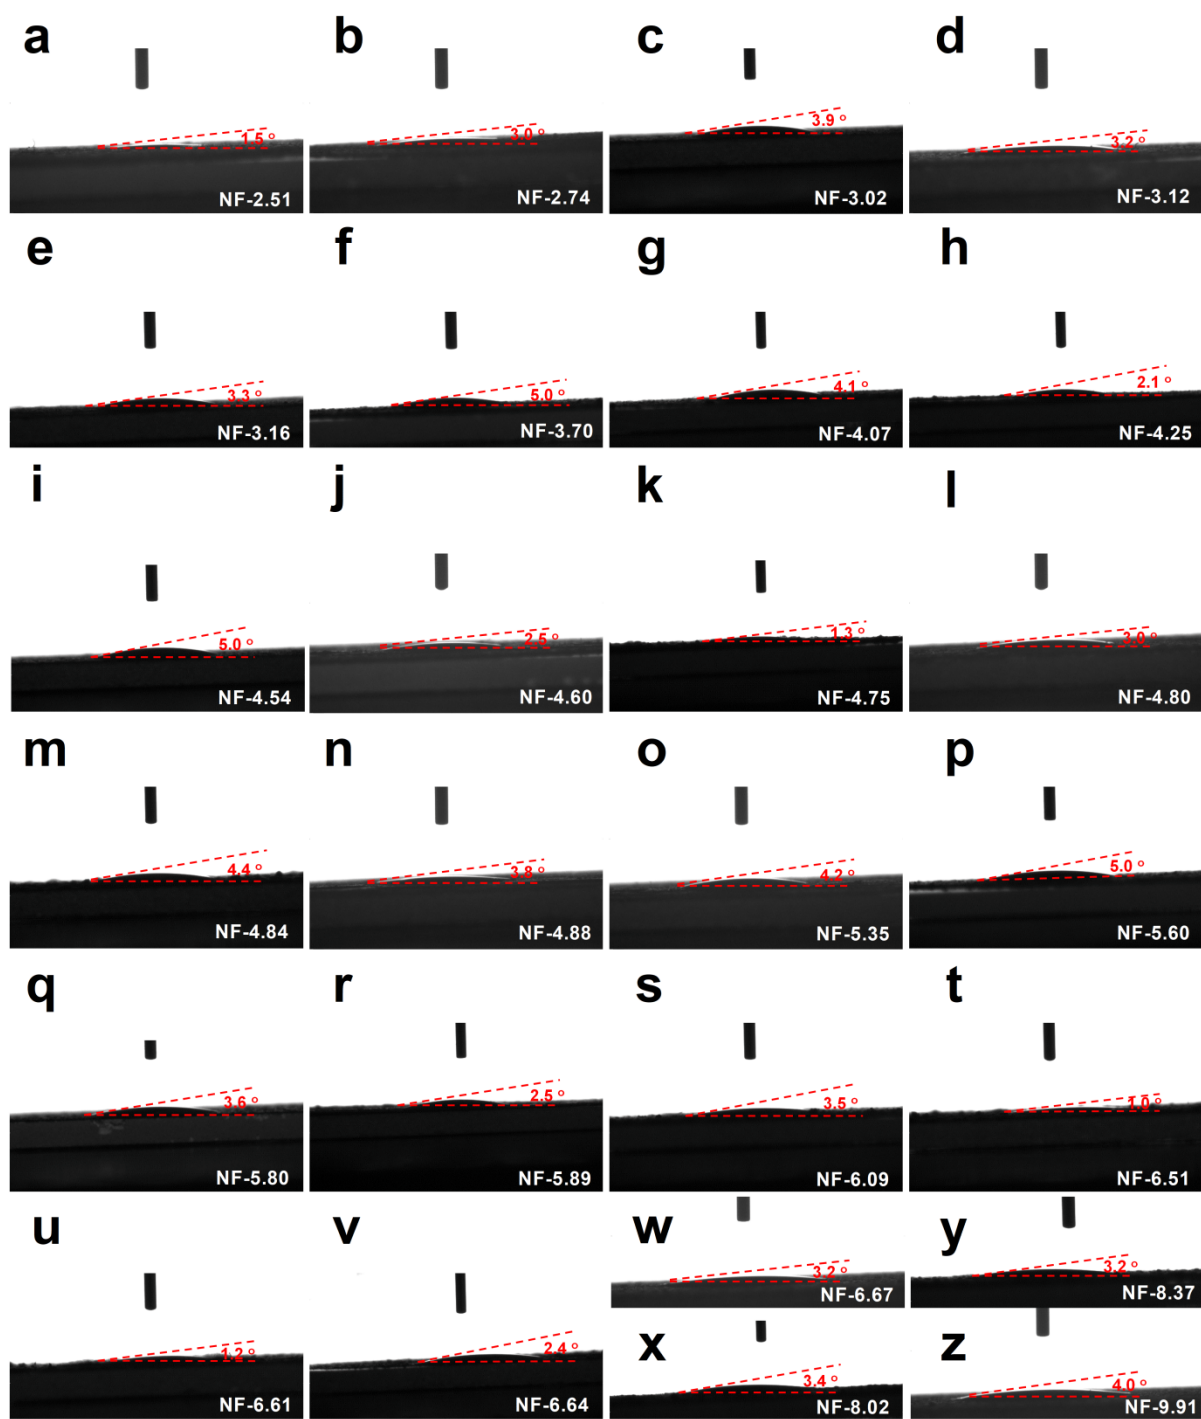

**Fig. S7** Water contact images for NF-y derived from (a) cantaloupe peel, (b) pomegranate peel, (c) bark, (d) longan shell, (e) white beech mushroom, (f) oil bran, (g) apricot flowers, (h) radish leaves, (i) corn stigmas, (j) winter melon peel, (k) durian peel, (l) willow leaves, (m) alfalfa, (n) banana peel, (o) radish peel, (p) leek moss, (q) dandelion leaves, (r) long bean, (s) sweet potato stems, (t) orange peel, (u) soybean curb residue, (v) firmiana simplex flowers, (w) sweet potato leaves, (x) wheat stalk, (y) solidago, (z) pepper leaves.

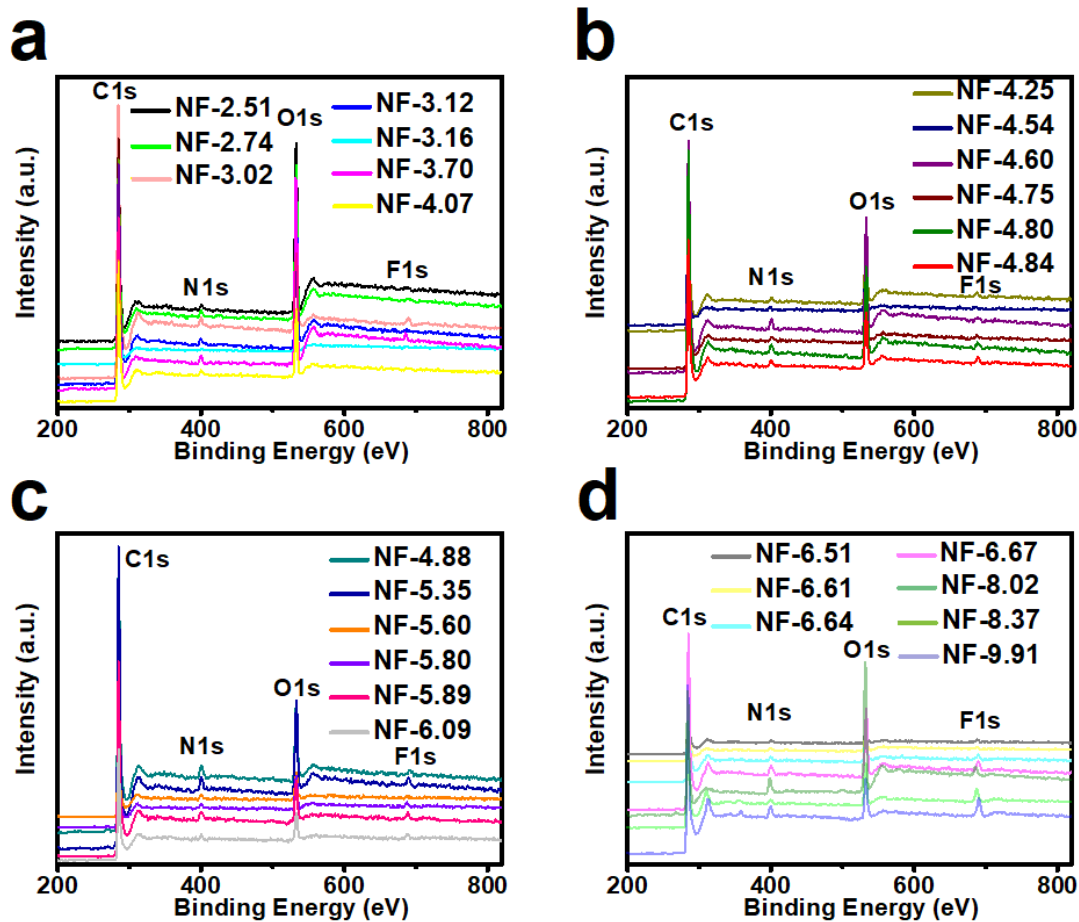

Fig. S8 XPS full spectra for NF-y derived from derived from cantaloupe peel, pomegranate peel, bark, longan shell, white beech mushroom, oil bran, apricot flowers, radish leaves, corn stigmas, winter melon peel, durian peel, willow leaves, alfalfa, banana peel, radish peel, leek moss, dandelion leaves, long bean, sweet potato stems, orange peel, soybean curd residue, firmiana simplex flowers, sweet potato leaves, wheat stalk, solidago, pepper leaves.

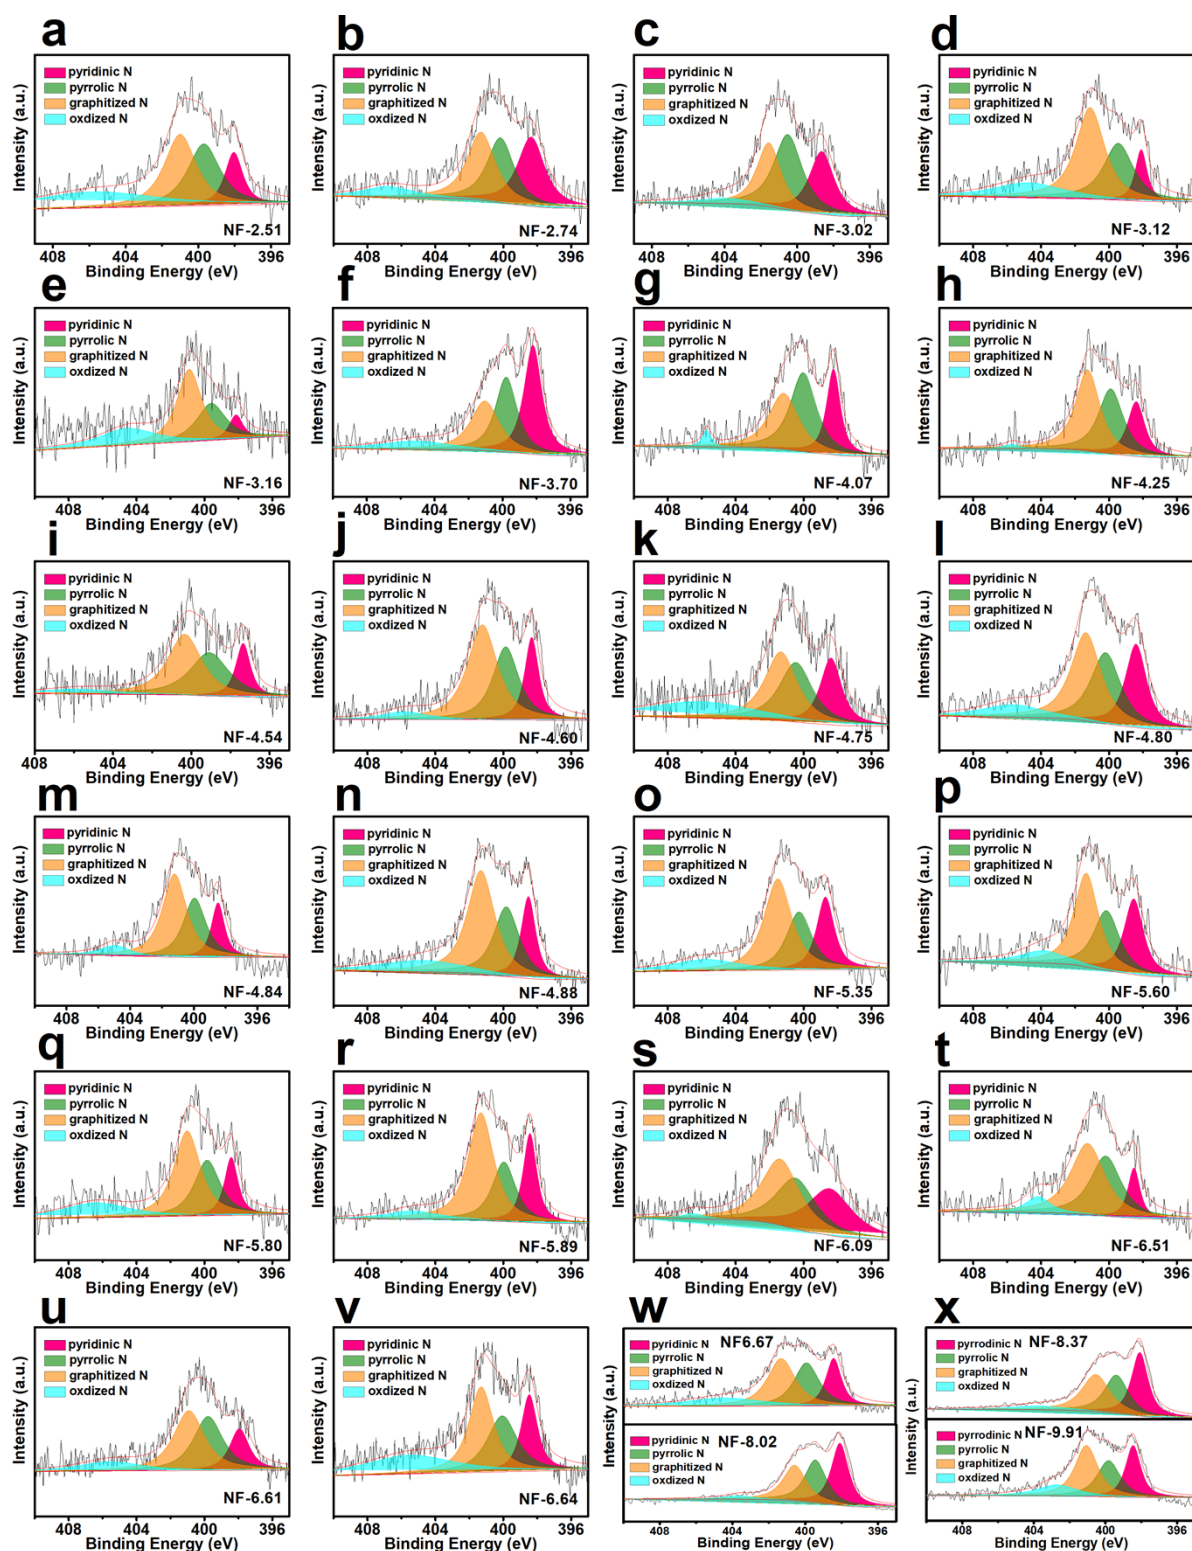

**Fig. S9** High resolution N1s spectra for NF-y derived from (a) cantaloupe peel, (b) pomegranate peel, (c) bark, (d) longan shell, (e) white beech mushroom, (f) oil bran, (g) apricot flowers, (h) radish leaves, (i) corn stigmas, (j) winter melon peel, (k) durian peel, (l) willow leaves, (m) alfalfa, (n) banana peel, (o) radish peel, (p) leek moss, (q) dandelion leaves, (r) long bean, (s) sweet potato stems, (t) orange peel, (u) soybean curb residue, (v) firmiana simplex flowers, (w) sweet potato leaves and wheat stalk, (x) solidago and pepper leaves.

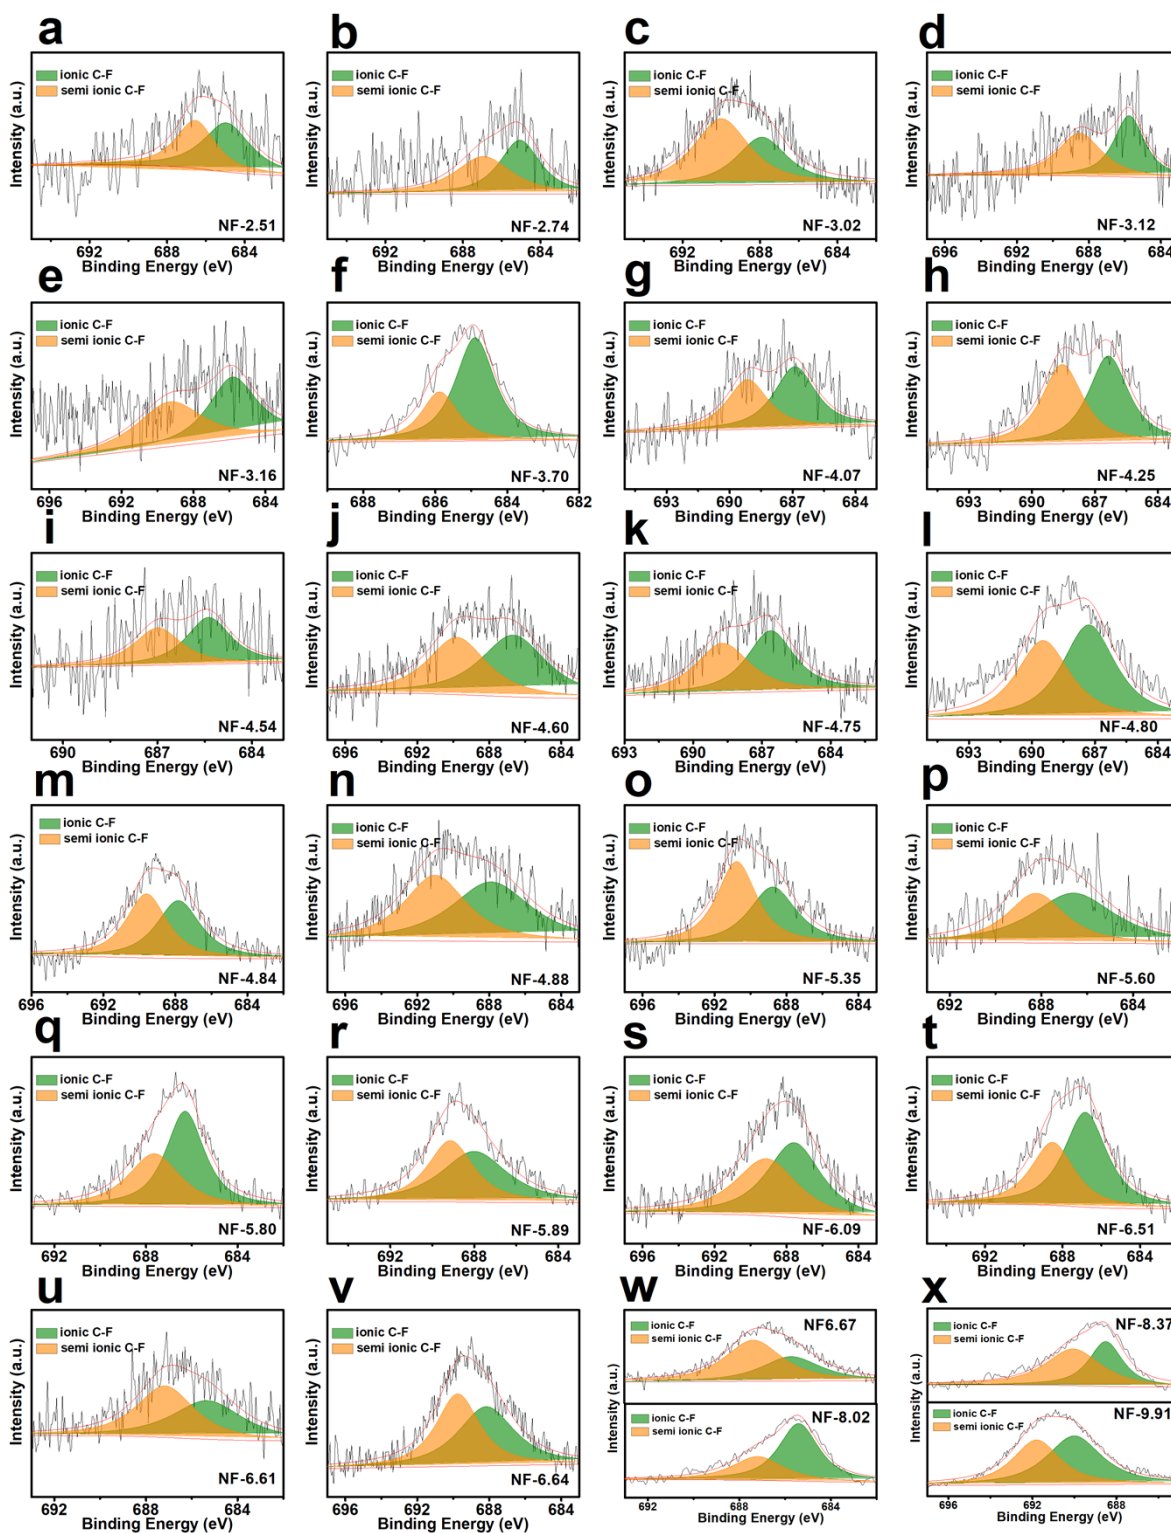

**Fig. S10** High resolution F1s spectra for NF-y derived from (a) cantaloupe peel, (b) pomegranate peel, (c) bark, (d) longan shell, (e) white beech mushroom, (f) oil bran, (g) apricot flowers, (h) radish leaves, (i) corn stigmas, (j) winter melon peel, (k) durian peel, (l) willow leaves, (m) alfalfa, (n) banana peel, (o) radish peel, (p) leek moss, (q) dandelion leaves, (r) long bean, (s) sweet potato stems, (t) orange peel, (u) soybean curb residue, (v) firmiana simplex flowers, (w) sweet potato leaves and wheat stalk, (x) solidago and pepper leaves.

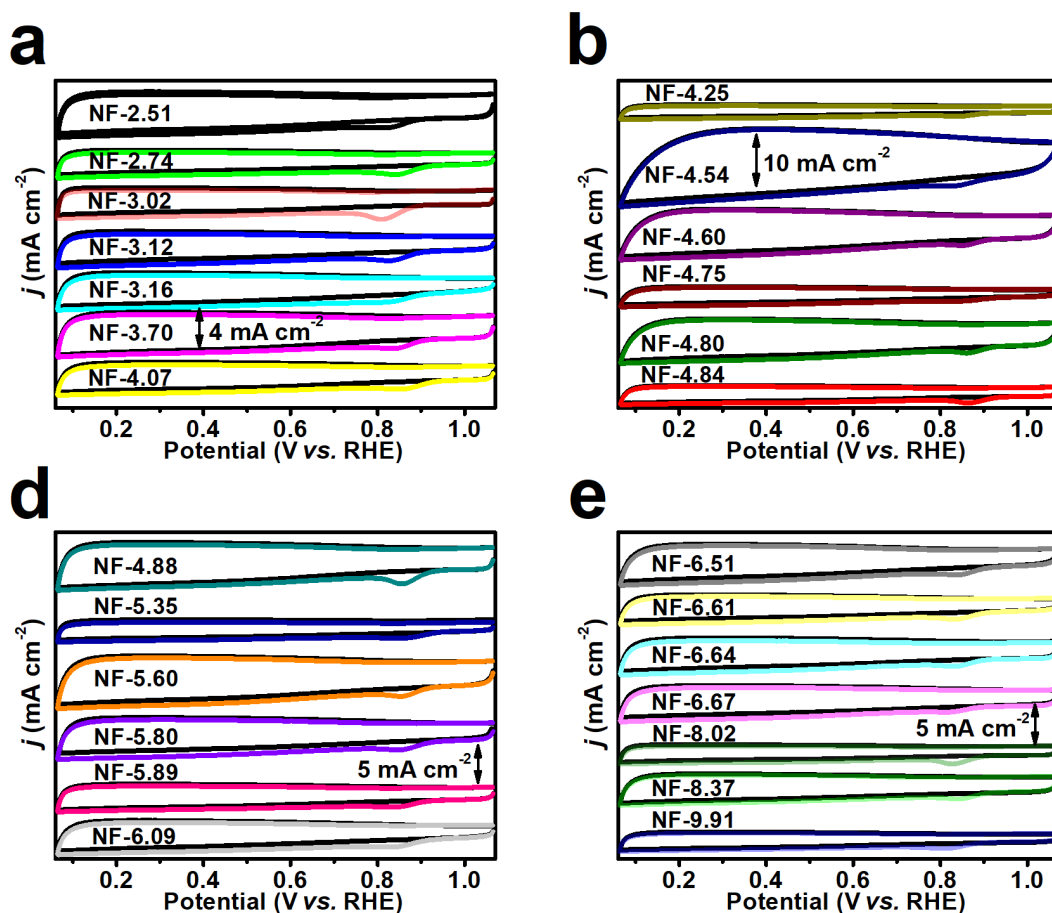

Fig. S11 CV curves (the as-obtained black/colored lines at  $N_2/O_2$ -saturated electrolyte) for NF-y derived from derived from cantaloupe peel, pomegranate peel , bark, longan shell, white beech mushroom, oil bran, apricot flowers, radish leaves corn stigmas, winter melon peel, durian peel, willow leaves, alfalfa, banana peel, radish peel, leek moss, dandelion leaves, long bean, sweet potato stems, orange peel, soybean curb residue, firmiana simplex flowers, sweet potato leaves, wheat stalk, solidago, pepper leaves.



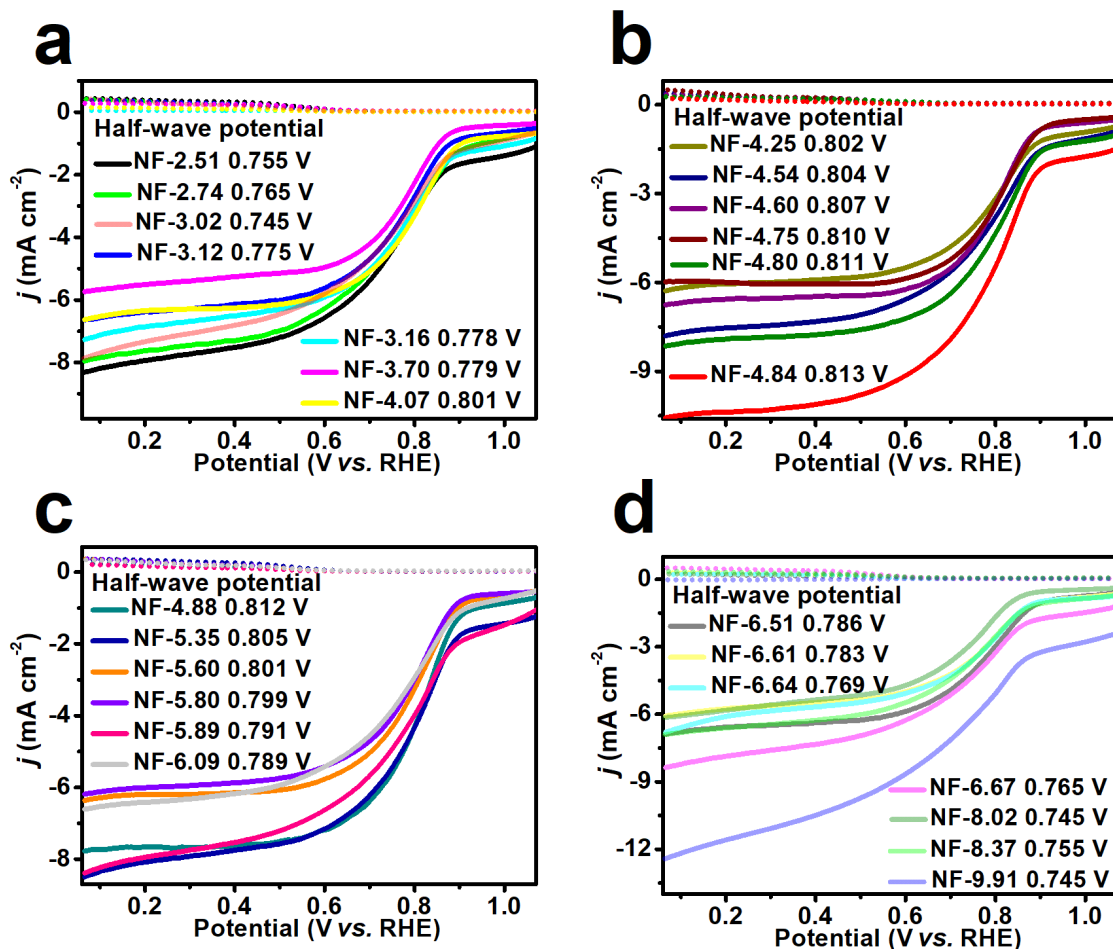

**Fig. S12** RRDE curves (the solid/dotted lines for disk/ring current density) for NF-y derived from cantaloupe peel, pomegranate peel, bark, longan shell, white beech mushroom, oil bran, apricot flowers, radish leaves, corn stigmas, winter melon peel, durian peel, willow leaves, alfalfa, banana peel, radish peel, leek moss, dandelion leaves, long bean, sweet potato stems, orange peel, soybean curd residue, firmiana simplex flowers, sweet potato leaves, wheat stalk, solidago, pepper leaves.

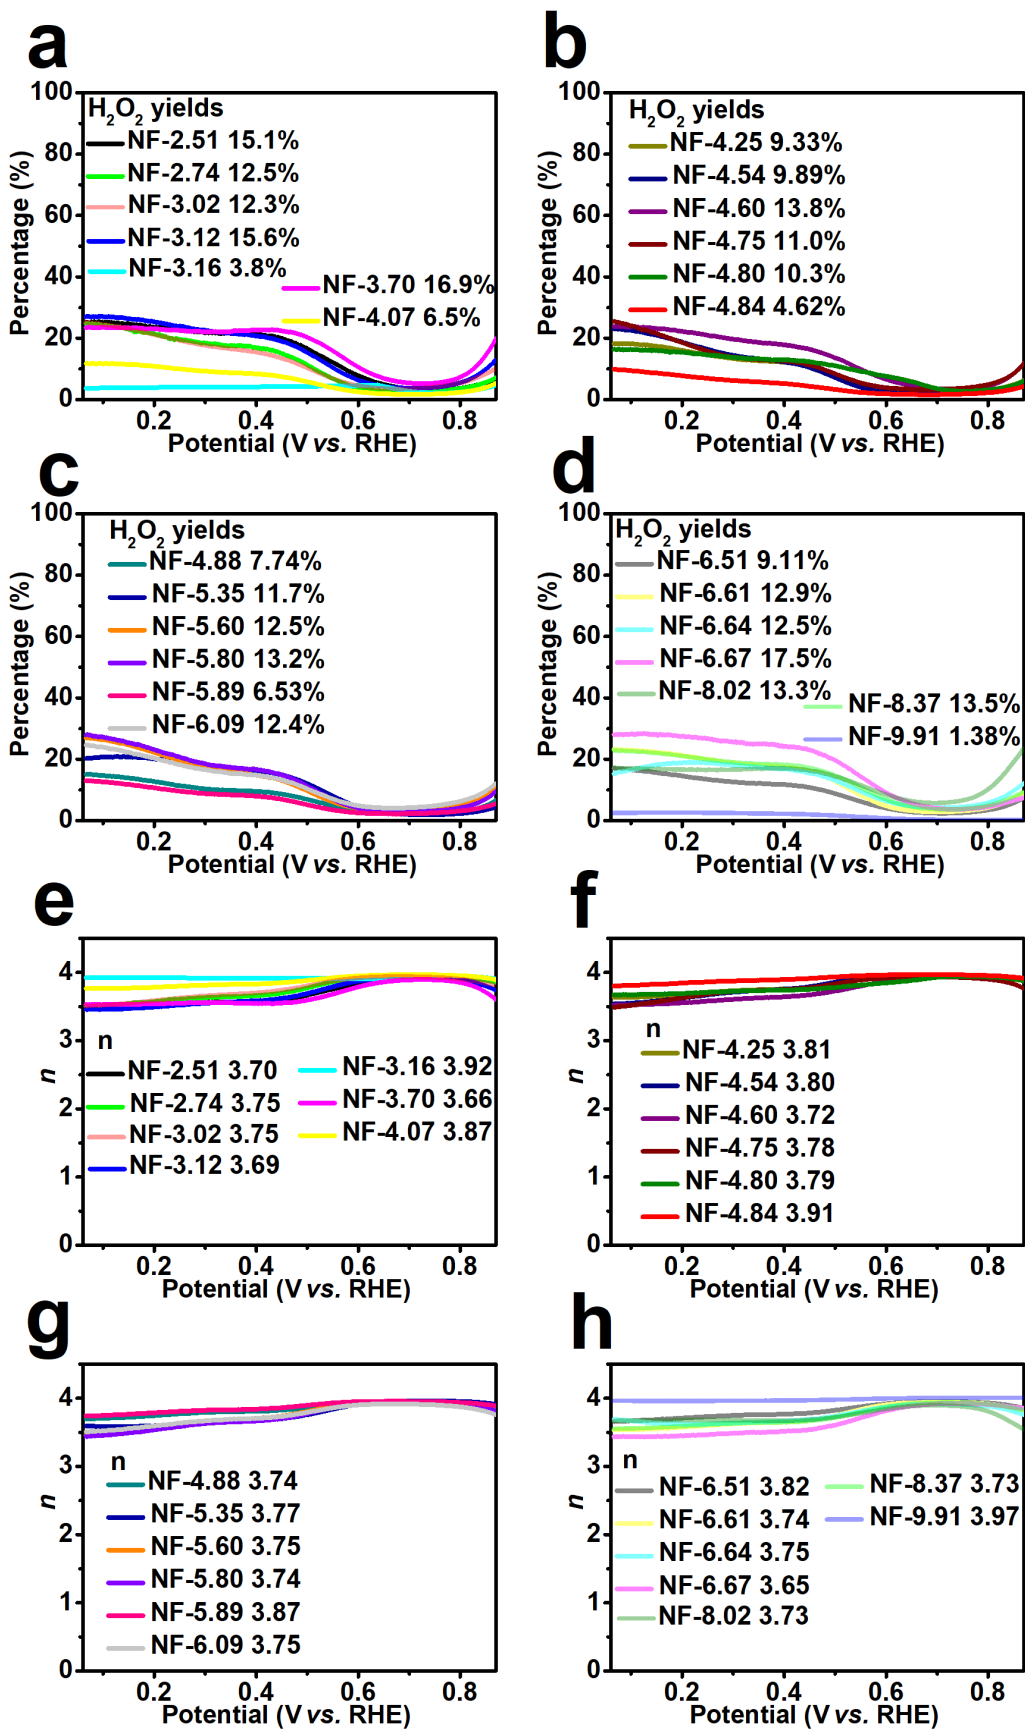

Fig. S13 (a-d)  $H_2O_2$ % yields, (e-h) electron transfer number for NF-y.

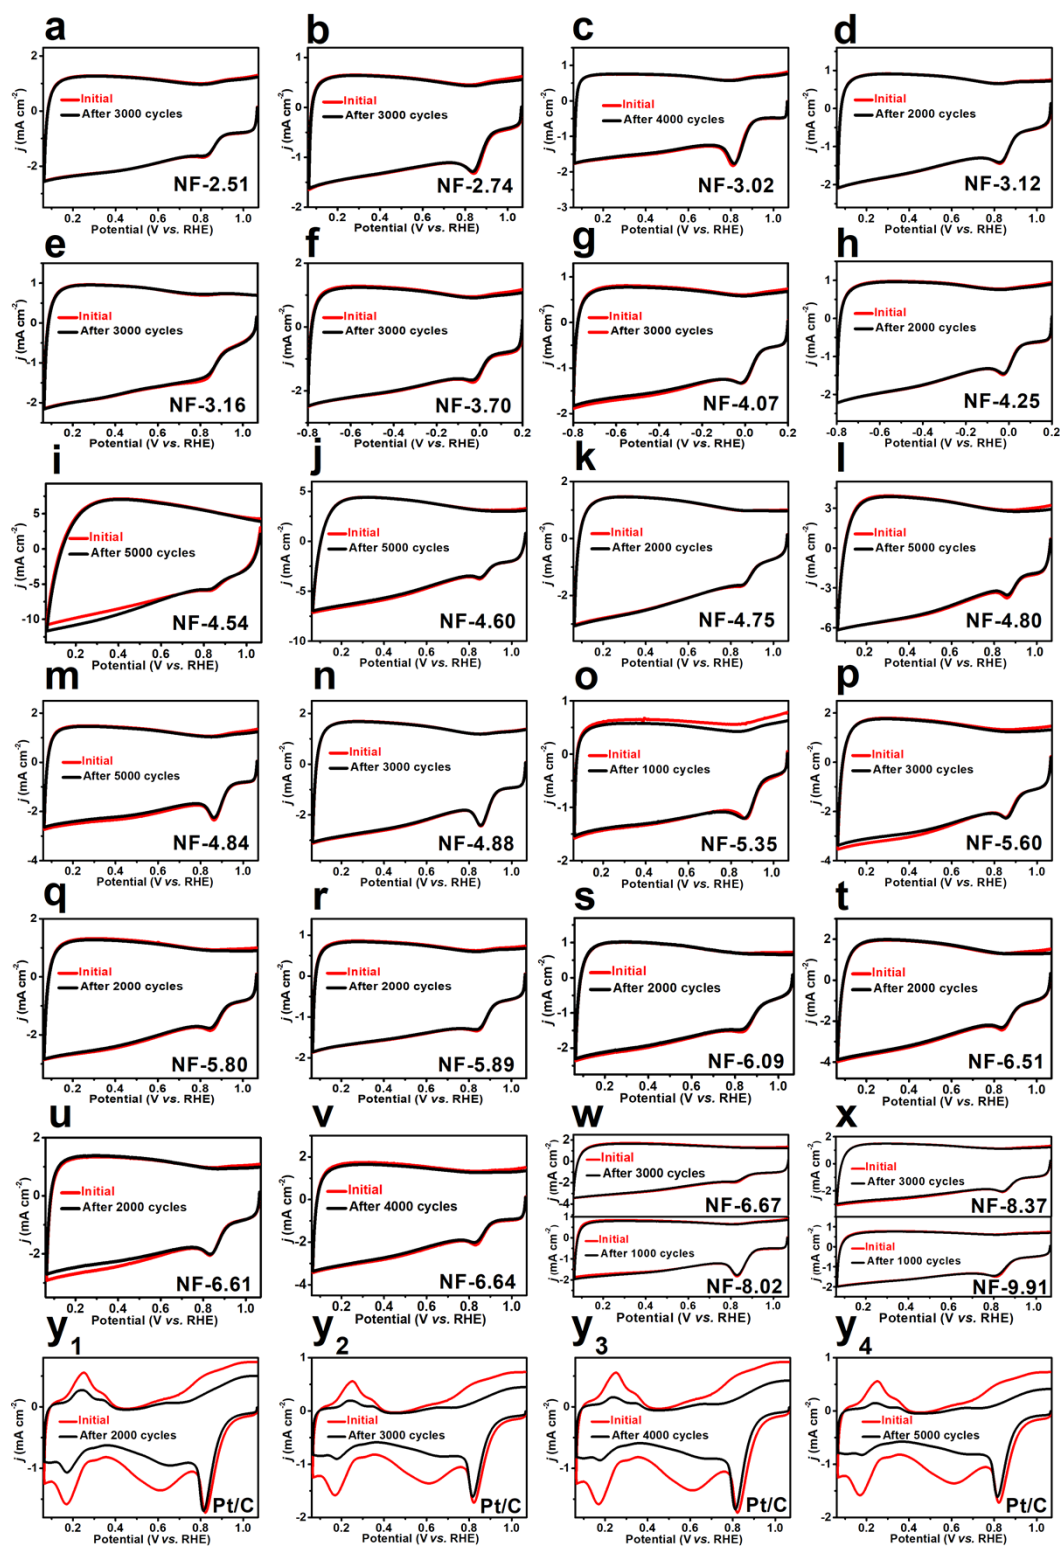

**Fig. S14** Stability tests for NF-y from (a) cantaloupe peel, (b) pomegranate peel, (c) bark, (d) longan shell, (e) white beech mushroom, (f) oil bran, (g) apricot flowers, (h) radish leaves, (i) corn stigmas, (j) winter melon peel, (k) durian peel, (l) willow leaves, (m) alfalfa, (n) banana peel, (o) radish peel, (p) leek moss, (q) dandelion leaves, (r) long bean, (s) sweet potato stems, (t) orange peel, (u) soybean curb residue, (v) firmiana simplex flowers, (w) sweet potato leaves and wheat stalk, (x) solidago and pepper leaves, (y) Pt/C.

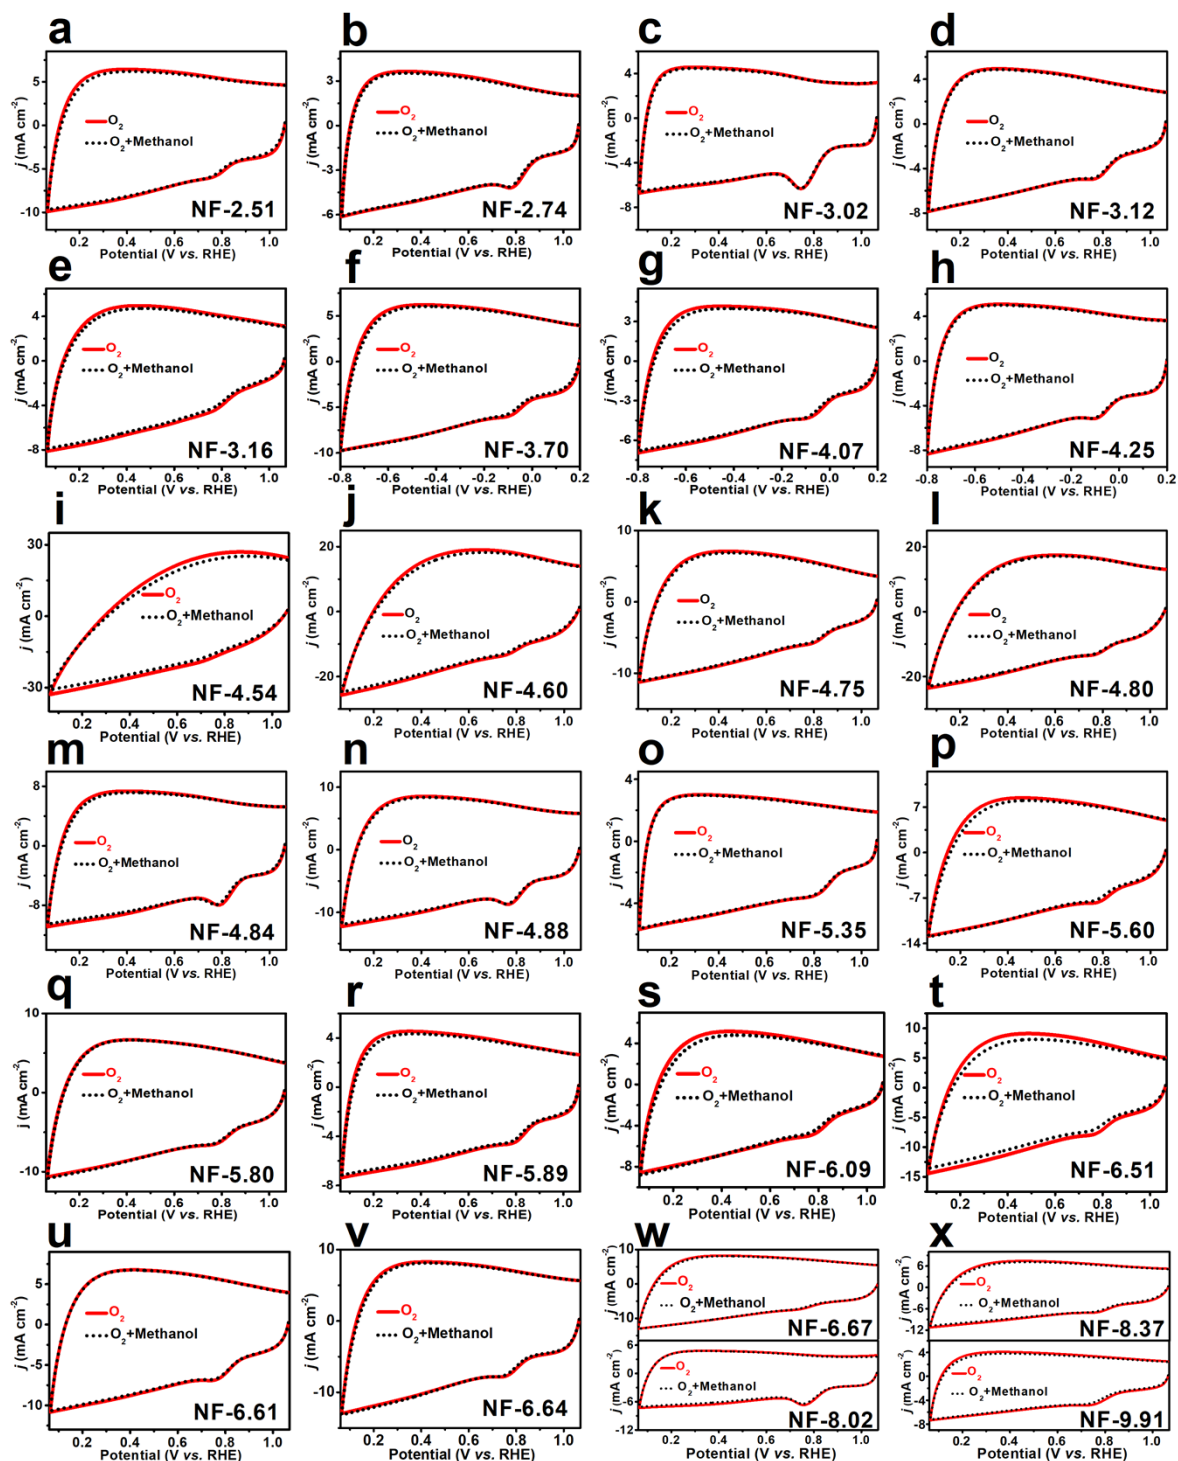

**Fig. S15** Methanol tolerance tests for NF-y derived from (a) cantaloupe peel, (b) pomegranate peel, (c) bark, (d) longan shell, (e) white beech mushroom, (f) oil bran, (g) apricot flowers, (h) radish leaves, (i) corn stigmas, (j) winter melon peel, (k) durian peel, (l) willow leaves, (m) alfalfa, (n) banana peel, (o) radish peel, (p) leek moss, (q) dandelion leaves, (r) long bean, (s) sweet potato stems, (t) orange peel, (u) soybean curb residue, (v) firmiana simplex flowers, (w) sweet potato leaves and wheat stalk, (x) solidago and pepper leaves.

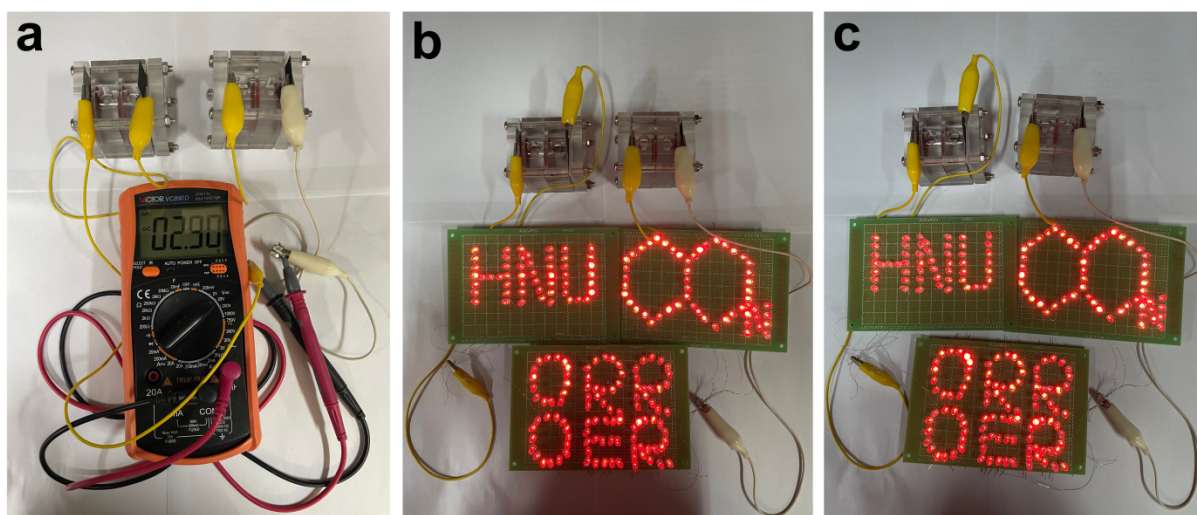

**Fig. S16** (a) Photograph of two series-connected ZABs with a measured open-circuit of 2.90 V, photographs for 210 LEDs driven by two ZABs (b) before and (c) after 24 hours.

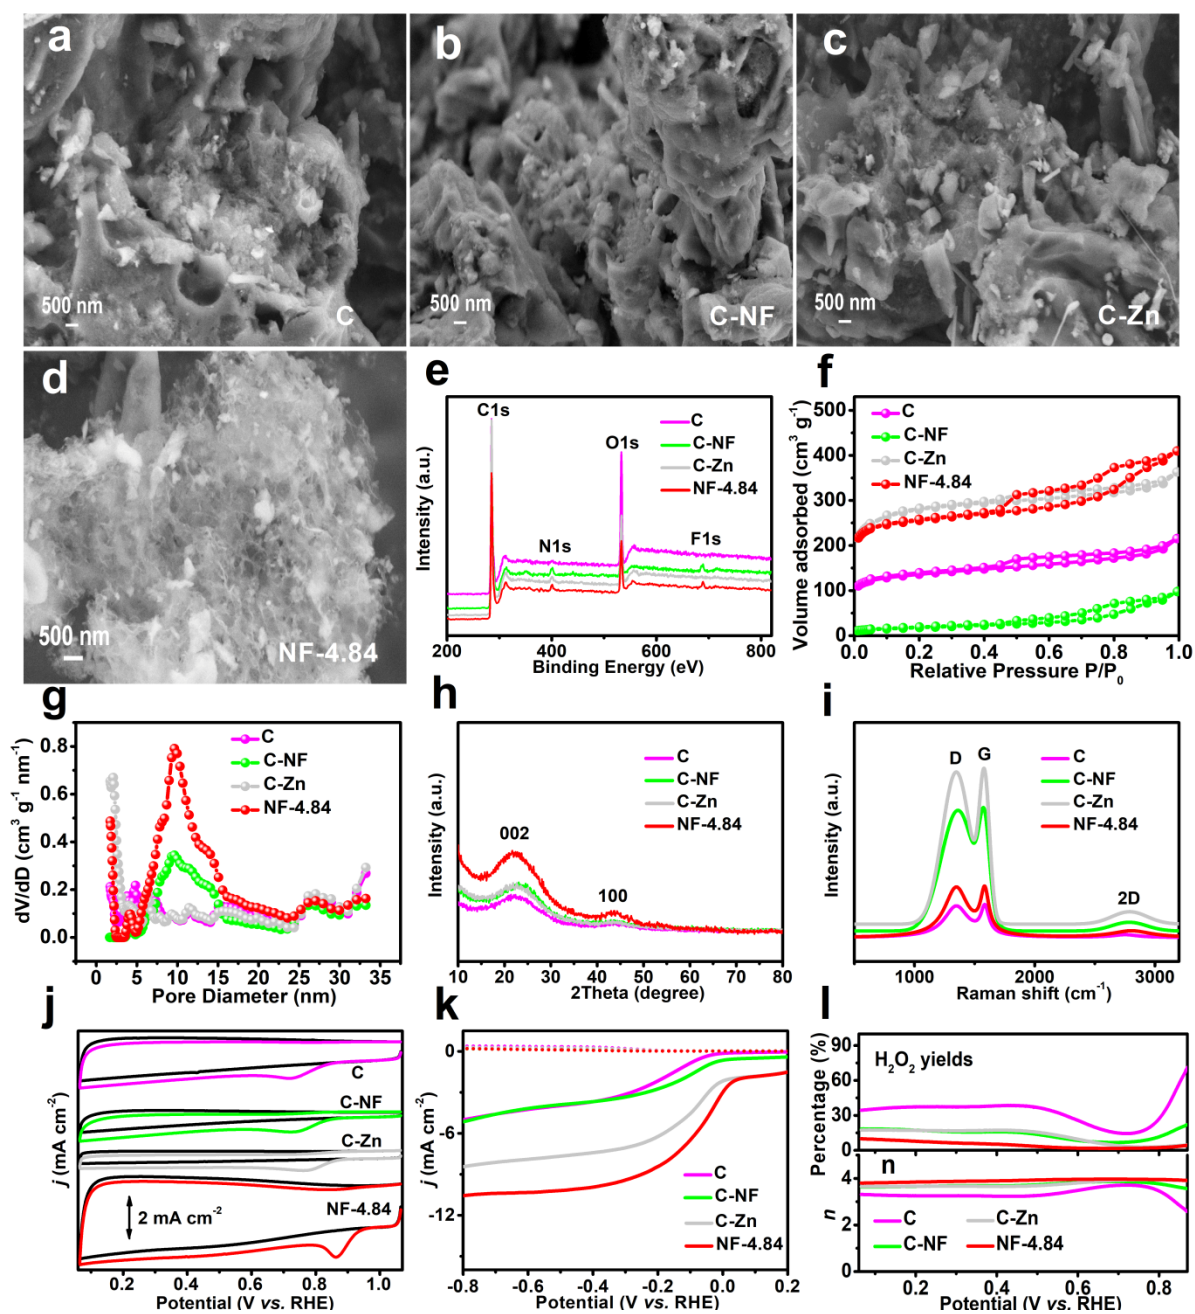

**Fig. S17** (a-d) SEM images, (e) XPS full spectra, (f)  $N_2$  adsorption-desorption isotherms, (g) pore size distributions, (h) XRD patterns, (i) Raman spectra, (j) CV curves, (k) RRDE curves,  $H_2O_2$  yields and (l)  $n$  for C, C-NF, C-Zn and NF-4.8, respectively.

**Table S1** Structural and electrocatalytic information for samples derived from alfalfa.

| Sample  | $S_{\text{BET}}$<br>[m <sup>2</sup> g <sup>-1</sup> ] <sup>a)</sup> | N content<br>[at. %] <sup>b)</sup> | F content<br>[at. %] <sup>c)</sup> | N and F content<br>[at. % ] <sup>d)</sup> | N /F <sup>e)</sup> | $E_{\text{peak}}$<br>[V] <sup>f)</sup> | $E_{\text{onset}}$<br>[V] <sup>g)</sup> | $E_{\text{half-wave}}$<br>[V] <sup>h)</sup> | $J_{\text{limiting}}$<br>[mA<br>cm <sup>-2</sup> ] <sup>i)</sup> |
|---------|---------------------------------------------------------------------|------------------------------------|------------------------------------|-------------------------------------------|--------------------|----------------------------------------|-----------------------------------------|---------------------------------------------|------------------------------------------------------------------|
| NF-3.31 | 1350                                                                | 2.58                               | 0.73                               | 3.31                                      | 2.53               | 0.821                                  | 0.926                                   | 0.793                                       | -6.0                                                             |
| NF-4.27 | 1452                                                                | 3.02                               | 1.25                               | 4.27                                      | 2.42               | 0.853                                  | 0.929                                   | 0.805                                       | -6.6                                                             |
| NF-4.84 | 1384                                                                | 3.55                               | 1.29                               | 4.84                                      | 2.75               | 0.863                                  | 0.943                                   | 0.806                                       | -10.5                                                            |
| NF-5.58 | 1400                                                                | 4.25                               | 1.33                               | 5.58                                      | 3.20               | 0.843                                  | 0.929                                   | 0.792                                       | -6.8                                                             |
| NF-6.44 | 1487                                                                | 4.39                               | 2.05                               | 6.44                                      | 2.14               | 0.830                                  | 0.925                                   | 0.782                                       | -8.1                                                             |
| NF-7.19 | 1395                                                                | 4.97                               | 2.22                               | 7.19                                      | 2.24               | 0.817                                  | 0.913                                   | 0.768                                       | -5.7                                                             |
| Pt/C    | —                                                                   | —                                  | —                                  | —                                         | —                  | 0.830                                  | 0.963                                   | 0.805                                       | -6.6                                                             |
| C       | 662                                                                 | 1.63                               | —                                  | —                                         | —                  | 0.723                                  | 0.845                                   | 0.635                                       | -5.0                                                             |
| C-NF    | 75                                                                  | 4.14                               | 1.82                               | 5.96                                      | 2.27               | 0.736                                  | 0.871                                   | 0.695                                       | -5.2                                                             |
| C-Zn    | 1251                                                                | 2.97                               | —                                  | —                                         | —                  | 0.778                                  | 0.902                                   | 0.778                                       | -8.4                                                             |

<sup>a)</sup>BET specific surface area; <sup>b)</sup>Nitrogen content; <sup>c)</sup>Flourine content; <sup>d)</sup>Total nitrogen and flourine content; <sup>e)</sup>The ratio of N to F content; <sup>f)</sup>Peak potential; <sup>g)</sup>Onset potential; <sup>h)</sup>Half-wave potential; <sup>i)</sup>Diffusion-limited current.

**Table S2** Structure information of N, F dual-doped porous carbon materials derived from different biomass precursors.

| Biomass                     | Sample  | $S_{\text{BET}}$<br>[m <sup>2</sup> g <sup>-1</sup> ] <sup>a)</sup> | N content<br>[at. %] <sup>b)</sup> | F content<br>[at. %] <sup>c)</sup> | N and F content<br>[at. %] <sup>d)</sup> | N /F <sup>e)</sup> | $I_D/I_G$ <sup>f)</sup> | CA<br>(°) <sup>g)</sup> |
|-----------------------------|---------|---------------------------------------------------------------------|------------------------------------|------------------------------------|------------------------------------------|--------------------|-------------------------|-------------------------|
| cantaloupe peel             | NF-2.51 | 1030                                                                | 1.84                               | 0.67                               | 2.51                                     | 2.75               | 1.21                    | 1.5                     |
| pomegranate peel            | NF-2.74 | 1105                                                                | 2.24                               | 0.5                                | 2.74                                     | 4.48               | 1.12                    | 3.0                     |
| bark                        | NF-3.02 | 1397                                                                | 1.81                               | 1.21                               | 3.02                                     | 1.50               | 1.16                    | 3.9                     |
| longan shell                | NF-3.12 | 1311                                                                | 2.47                               | 0.65                               | 3.12                                     | 3.8                | 1.17                    | 3.2                     |
| white beech mushroom        | NF-3.16 | 1001                                                                | 2.26                               | 0.9                                | 3.16                                     | 2.51               | 1.18                    | 3.3                     |
| oil bran                    | NF-3.70 | 1180                                                                | 2.62                               | 1.08                               | 3.7                                      | 2.43               | 1.19                    | 5.0                     |
| apricot flowers             | NF-4.07 | 1284                                                                | 3.28                               | 0.79                               | 4.07                                     | 4.15               | 1.17                    | 4.1                     |
| radish leaves               | NF-4.25 | 1391                                                                | 2.92                               | 1.33                               | 4.25                                     | 2.2                | 1.16                    | 2.1                     |
| corn stigmas                | NF-4.54 | 1389                                                                | 3.72                               | 0.82                               | 4.54                                     | 4.54               | 1.18                    | 5.0                     |
| winter melon peel           | NF-4.60 | 1306                                                                | 3.74                               | 0.86                               | 4.6                                      | 4.35               | 1.19                    | 2.5                     |
| durian peel                 | NF-4.75 | 1269                                                                | 3.51                               | 1.24                               | 4.75                                     | 2.83               | 1.13                    | 1.3                     |
| willow leaves               | NF-4.80 | 1207                                                                | 3.71                               | 1.09                               | 4.80                                     | 3.40               | 1.15                    | 3.0                     |
| alfalfa                     | NF-4.84 | 1384                                                                | 3.55                               | 1.29                               | 4.84                                     | 2.75               | 1.19                    | 4.4                     |
| banana peel                 | NF-4.88 | 1088                                                                | 3.75                               | 1.13                               | 4.88                                     | 3.31               | 1.14                    | 3.8                     |
| radish peel                 | NF-5.35 | 1398                                                                | 4.11                               | 1.24                               | 5.35                                     | 3.31               | 1.16                    | 4.2                     |
| leek moss                   | NF-5.60 | 1337                                                                | 4.4                                | 1.2                                | 5.6                                      | 3.67               | 1.18                    | 5.0                     |
| dandelion leaves            | NF-5.80 | 1395                                                                | 3.85                               | 1.95                               | 5.8                                      | 1.97               | 1.20                    | 3.6                     |
| long bean                   | NF-5.89 | 1322                                                                | 4.41                               | 1.48                               | 5.89                                     | 2.98               | 1.18                    | 2.5                     |
| sweet potato stems          | NF-6.09 | 1102                                                                | 3.92                               | 2.17                               | 6.09                                     | 1.81               | 1.18                    | 3.5                     |
| orange peel                 | NF-6.51 | 1023                                                                | 4.24                               | 2.27                               | 6.51                                     | 1.88               | 1.18                    | 1.0                     |
| soybean curb residue        | NF-6.61 | 1241                                                                | 5.26                               | 1.35                               | 6.61                                     | 2.65               | 1.20                    | 1.2                     |
| firmiana simplex<br>flowers | NF-6.64 | 1007                                                                | 4.56                               | 2.08                               | 6.64                                     | 2.19               | 1.20                    | 2.4                     |
| sweet potato leaves         | NF-6.67 | 1366                                                                | 4.35                               | 2.32                               | 6.67                                     | 1.88               | 1.20                    | 3.2                     |
| wheat stalk                 | NF-8.02 | 1388                                                                | 6.51                               | 1.51                               | 8.02                                     | 4.31               | 1.18                    | 3.4                     |
| solidago                    | NF-8.37 | 1039                                                                | 4.5                                | 3.87                               | 8.37                                     | 1.16               | 1.19                    | 3.2                     |
| pepper leaves               | NF-9.91 | 1154                                                                | 5.42                               | 4.49                               | 9.91                                     | 1.21               | 1.21                    | 4.0                     |

<sup>a)</sup>BET specific surface area; <sup>b)</sup>Nitrogen content; <sup>c)</sup>Flourine content; <sup>d)</sup>Total nitrogen and flourine content; <sup>e)</sup>The ratio of N to F content; <sup>f)</sup> $I_D/I_G$  value; <sup>g)</sup>water contact angle.



**Table S3** Electrocatalytic performances of N, F dual-doped porous carbon materials derived from different biomass precursors.

| Biomass              | Biomass | $E_{\text{peak}}$<br>[V] <sup>a)</sup> | $J_{\text{peak}}$<br>[mA cm <sup>-2</sup> ] <sup>b)</sup> | $E_{\text{half-wave}}$<br>[V] <sup>c)</sup> | $E_{\text{onset}}$<br>[V] <sup>d)</sup> | $J_{\text{limiting}}$<br>[mA cm <sup>-2</sup> ] <sup>e)</sup> |
|----------------------|---------|----------------------------------------|-----------------------------------------------------------|---------------------------------------------|-----------------------------------------|---------------------------------------------------------------|
| cantaloupe peel      | NF-2.51 | 0.823                                  | -1.72                                                     | 0.755                                       | 0.916                                   | -8.3                                                          |
| pomegranate peel     | NF-2.74 | 0.842                                  | -1.36                                                     | 0.765                                       | 0.917                                   | -8.0                                                          |
| bark                 | NF-3.02 | 0.810                                  | -1.84                                                     | 0.745                                       | 0.915                                   | -7.9                                                          |
| longan shell         | NF-3.12 | 0.829                                  | -1.50                                                     | 0.775                                       | 0.925                                   | -6.6                                                          |
| white beech          | NF-3.16 | 0.830                                  | -1.45                                                     | 0.778                                       | 0.921                                   | -7.2                                                          |
| mushroom             | NF-3.70 | 0.838                                  | -1.78                                                     | 0.779                                       | 0.925                                   | -5.6                                                          |
| oil bran             | NF-4.07 | 0.852                                  | -1.36                                                     | 0.801                                       | 0.934                                   | -6.6                                                          |
| apricot flowers      | NF-4.25 | 0.840                                  | -1.53                                                     | 0.802                                       | 0.923                                   | -6.2                                                          |
| radish leaves        | NF-4.54 | 0.841                                  | -6.08                                                     | 0.804                                       | 0.932                                   | -7.7                                                          |
| corn stigmas         | NF-4.60 | 0.850                                  | -3.92                                                     | 0.807                                       | 0.929                                   | -6.7                                                          |
| winter melon peel    | NF-4.75 | 0.858                                  | -1.74                                                     | 0.810                                       | 0.937                                   | -6.0                                                          |
| durian peel          | NF-4.80 | 0.859                                  | -3.86                                                     | 0.811                                       | 0.940                                   | -8.2                                                          |
| willow leaves        | NF-4.84 | 0.863                                  | -2.42                                                     | 0.806                                       | 0.939                                   | -10.4                                                         |
| alfalfa              | NF-4.88 | 0.854                                  | -2.50                                                     | 0.812                                       | 0.940                                   | -7.8                                                          |
| banana peel          | NF-5.35 | 0.850                                  | -1.16                                                     | 0.805                                       | 0.927                                   | -8.5                                                          |
| radish peel          | NF-5.60 | 0.854                                  | -2.32                                                     | 0.801                                       | 0.930                                   | -6.3                                                          |
| leek moss            | NF-5.80 | 0.849                                  | -1.90                                                     | 0.799                                       | 0.932                                   | -6.1                                                          |
| dandelion leaves     | NF-5.89 | 0.844                                  | -1.38                                                     | 0.791                                       | 0.927                                   | -8.4                                                          |
| long bean            | NF-6.09 | 0.841                                  | -1.59                                                     | 0.789                                       | 0.928                                   | -6.5                                                          |
| sweet potato stems   | NF-6.51 | 0.839                                  | -2.50                                                     | 0.786                                       | 0.928                                   | -6.8                                                          |
| orange peel          | NF-6.61 | 0.833                                  | -2.12                                                     | 0.783                                       | 0.931                                   | -6.0                                                          |
| soybean curb residue | NF-6.64 | 0.830                                  | -2.20                                                     | 0.769                                       | 0.927                                   | -10.6                                                         |
| firmiana simplex     | NF-6.67 | 0.830                                  | -2.05                                                     | 0.765                                       | 0.925                                   | -8.4                                                          |
| flowers              | NF-8.02 | 0.831                                  | -1.87                                                     | 0.745                                       | 0.917                                   | -6.1                                                          |
| wheat stalk          | NF-8.37 | 0.843                                  | -2.16                                                     | 0.755                                       | 0.922                                   | -7.0                                                          |
| solidago             | NF-9.91 | 0.810                                  | -1.55                                                     | 0.745                                       | 0.930                                   | -12.5                                                         |
| pepper leaves        | P/C     | 0.830                                  | -1.75                                                     | 0.805                                       | 0.963                                   | -6.6                                                          |

<sup>a)</sup>Peak potential; <sup>b)</sup>Peak current density; <sup>c)</sup>Half-wave potential; <sup>d)</sup>Onset potential; <sup>e)</sup>Diffusion-limited current density.

**Table S4** Comparison of electrocatalytic performances in terms of ORR half-wave potential (0.1 M KOH) & OER potential at 10 mA cm<sup>-2</sup> (1 M KOH) and ZAB performance between this work and other related reports.

| references | $E_{\text{half-wave}}$<br>[V] <sup>a)</sup> | $E_{j=10}$<br>[V] <sup>b)</sup> | $P_{\text{ZAB}}$<br>[mW cm <sup>-2</sup> ] <sup>c)</sup> | $S_{\text{ZAB}}$<br>[h] <sup>d)</sup> |
|------------|---------------------------------------------|---------------------------------|----------------------------------------------------------|---------------------------------------|
| This work  | 0.806                                       | 1.41                            | 116                                                      | 88 h at 5 mA cm <sup>-2</sup>         |
| 1          | 0.8153                                      | 1.5983                          | 97                                                       | 66 h at 5 mA cm <sup>-2</sup>         |
| 2          | 0.84                                        | -                               | 67                                                       | 60 h at 5 mA cm <sup>-2</sup>         |
| 3          | 0.83                                        | -                               | 115                                                      | -                                     |
| 4          | 0.85                                        | 1.6                             | 175                                                      | 50 h at 10 mA cm <sup>-2</sup>        |
| 5          | 0.80                                        | 1.54                            | 135                                                      | 136 h at 10 mA cm <sup>-2</sup>       |
| 6          | 0.79                                        | -                               | 152                                                      | 60 h at 2 mA cm <sup>-2</sup>         |
| 7          | 0.817                                       | 1.58                            | 105                                                      | 40 h at 5 mA cm <sup>-2</sup>         |
| 8          | 0.85                                        | 1.57                            | 151                                                      | 55 h at 5 mA cm <sup>-2</sup>         |
| 9          | 0.85                                        | 1.68                            | 115                                                      | 78 h at 10 mA cm <sup>-2</sup>        |
| 10         | 0.790                                       | 1.542                           | -                                                        | 80 h at 25 mA cm <sup>-2</sup>        |
| 11         | 0.81                                        | 1.51                            | 81                                                       | 160 h at 10 mA cm <sup>-2</sup>       |
| 12         | 0.90 V                                      | -                               | 125                                                      | 60 h at 5 mA cm <sup>-2</sup>         |

<sup>a)</sup>ORR half-wave potential; <sup>b)</sup>OER potential at 10 mA cm<sup>-2</sup>. <sup>c)</sup>Peak power density of ZAB with catalyst. <sup>d)</sup>Long-term stability of ZAB with catalyst.

## References

1. T. Li, Y. Lu, S. Zhao, Z.-D. Gao, Y.-Y. Song, *J. Mater. Chem. A*, 2018, **6**, 3730.
2. L. Wang, K. Liang, L. Deng, Y.-N. Liu, *Appl. Catal. B*, 2019, **246**, 89.
3. F. Li, Y. Yin, C. Zhang, W. Li, K. Maliutina, Q. Zhang, Q. Wu, C. He, Y. Zhang, M. Yang, L. Fan, *Appl. Catal. B*, 2020, **263**, 118297.
4. K. He, J. Zaia, X. Liu, Y. Zhu, A. Iqbal, T. T. Tsega, Y. Zhang, N. Ali, X. Qian, *Appl. Catal. B*, 2020, **265**, 118594.
5. F. Meng, H. Zhong, D. Bao, J. Yan, X. Zhang, *J. Am. Chem. Soc.*, 2016, **138**, 10226.
6. C. Tang, B. Wang, H.-F. Wang, Q. Zhang, *Adv. Mater.*, 2017, **29**, 1703185.
7. M. Zhang, Q. Dai, H. Zheng, M. Chen, L. Dai, *Adv. Mater.*, 2018, **30**, 1705431.
8. Z. Pei, H. Li, Y. Huang, Q. Xue, Y. Huang, M. Zhu, Z. Wang, C. Zhi, *Energy Environ. Sci.*, 2017, **10**, 742.
9. Q. Wang, Y. Ji, Y. Lei, Y. Wang, Y. Wang, Y. Li, S. Wang, *ACS Energy Lett.*, 2018, **3**, 1183.
10. Q. Wang, L. Shang, R. Shi, X. Zhang, Y. Zhao, G. I. N. Waterhouse, L.-Z. Wu, C.-H. Tung, T. Zhang, *Adv. Energy Mater.*, 2017, **7**, 1700467.
11. X. F. Lu, S. L. Zhang, E. Shangguan, P. Zhang, S. Gao, X. W. (David) Lou, *Adv. Sci.*, 2020, **7**, 2001178.
12. L.-L. Ma, W.-J. Liu, X. Hu, P. K.S. Lam, J. R. Zeng, H.-Q. Yu, *Chem. Eng. J.*, 2020, **400**, 125969.
